# Supplementary material
Source: HighWire-hosted journal article supplement (https://bmjopenquality.bmj.com/content/11/1/e001658)
Supplement: inline-supplementary-material-2 [file inline-supplementary-material-2.pdf]

**Appendix 2: Need analysis and instructor course curriculum**

|         |                                                                                                                                                                                                                                                                                                                                                                                                                                                                                                                                                                                        |
|---------|----------------------------------------------------------------------------------------------------------------------------------------------------------------------------------------------------------------------------------------------------------------------------------------------------------------------------------------------------------------------------------------------------------------------------------------------------------------------------------------------------------------------------------------------------------------------------------------|
| Why     | Hospital management was in dialogue with MidtSim making an agreement on how MidtSim should offer an educating program. It was decided that there was a need for approximately 40 instructors total in the clinic.                                                                                                                                                                                                                                                                                                                                                                      |
| Mission | To coordinate, plan, facilitate and support simulation for health professionals in order to contribute to the employees' competence development, organisational learning and patient safety.                                                                                                                                                                                                                                                                                                                                                                                           |
| Theory  | Based on Curriculum Development for Medical Education using the theory 'A Six-Step Approach' <sup>1</sup> , MidtSim prepared a proposal for the in situ simulator instructor program. The proposal is rooted within evidence-based knowledge about learning and competence development, organizational learning and finally the overall aim of clinical simulation.                                                                                                                                                                                                                    |
| Aim     | To create optimal conditions including relevant experience and learning for all participants before simulation is actually implemented in the hospitals.<br>To actively include participants to support transfer and increase learning outcomes.<br>To support the implementation of simulation and networking between the instructors.                                                                                                                                                                                                                                                |
| Content | Module 1: Theory and practical exercises<br>- Theoretical presentations by simulation experts employed in MidtSim.<br>- Participants practicing the role of being an instructor.<br>Module 2: Performing simulation in situ<br>- Two instructors (doctor and nurse) design a scenario and facilitate it in front of colleagues.<br>- The instructors practice feedback, and prepare for module 3.<br>Module 3: Feedback and qualification<br>- The two instructors facilitate their own scenario and receive feedback from another participant including MidtSim's simulation experts. |

**Note:** 1 Thomas PA, Kern DE, Hughes MT, et al. Curriculum Development for Medical Education : A Six-Step Approach. Baltimore, UNITED STATES: : Springer Publishing Company, Incorporated 2015. <http://ebookcentral.proquest.com/lib/asb/detail.action?docID=4398487>
